# Supplementary material
Source: publisher site journal article supplement (https://www.spandidos-publications.com/7620/downloadSupplementary)
Supplement: Supplementary file 1 [file downloadSupplementary]

Table SI. Clinicopathological and immunohistochemical characteristics of Warthin tumours.

| Patient no. | Age, years | Smoking history, number of cigarettes/day x years of smoking | Presence of metaplastic epithelium | Conventional bilayered oncocytic epithelium, number of cells in five high-power fields |                                          |                                          |       | Metaplastic epithelium, number of cells in five high-power fields |                                          |                                          |       |
|-------------|------------|--------------------------------------------------------------|------------------------------------|----------------------------------------------------------------------------------------|------------------------------------------|------------------------------------------|-------|-------------------------------------------------------------------|------------------------------------------|------------------------------------------|-------|
|             |            |                                                              |                                    | POU2F3 <sup>+</sup> /H-PGDS <sup>+</sup>                                               | POU2F3 <sup>+</sup> /H-PGDS <sup>-</sup> | POU2F3 <sup>-</sup> /H-PGDS <sup>+</sup> | Ratio | POU2F3 <sup>+</sup> /H-PGDS <sup>+</sup>                          | POU2F3 <sup>+</sup> /H-PGDS <sup>-</sup> | POU2F3 <sup>-</sup> /H-PGDS <sup>+</sup> | Ratio |
| 1           | 69         | 5x50                                                         | Not present                        | 57                                                                                     | 6                                        | 7                                        | 0.905 |                                                                   |                                          |                                          |       |
| 2           | 75         | 30x47                                                        | Present                            | 8                                                                                      | 152                                      | 5                                        | 0.050 | 4                                                                 | 388                                      | 8                                        | 0.010 |
| 3           | 55         | 20x40                                                        | Not present                        | 9                                                                                      | 2                                        | 4                                        | 0.818 |                                                                   |                                          |                                          |       |
| 4           | 60         | 20x25 (past)                                                 | Present                            | 26                                                                                     | 5                                        | 2                                        | 0.839 | 16                                                                | 139                                      | 2                                        | 0.103 |
| 5           | 59         | 10x38                                                        | Present                            | 65                                                                                     | 1                                        | 9                                        | 0.985 | 1                                                                 | 305                                      | 2                                        | 0.003 |
| 6           | 71         | No                                                           | Not present                        | 34                                                                                     | 3                                        | 6                                        | 0.919 |                                                                   |                                          |                                          |       |
| 7           | 71         | 12x50                                                        | Not present                        | 66                                                                                     | 6                                        | 9                                        | 0.917 |                                                                   |                                          |                                          |       |
| 8           | 77         | No                                                           | Present                            | 77                                                                                     | 5                                        | 17                                       | 0.939 | 13                                                                | 32                                       | 7                                        | 0.289 |
| 9           | 80         | 20x58 (past)                                                 | Present                            | 74                                                                                     | 3                                        | 18                                       | 0.961 | 21                                                                | 173                                      | 7                                        | 0.108 |
| 10          | 72         | No                                                           | Present                            | 12                                                                                     | 36                                       | 5                                        | 0.250 | 7                                                                 | 371                                      | 5                                        | 0.019 |
| 11          | 54         | 20x36                                                        | Present                            | 52                                                                                     | 7                                        | 4                                        | 0.881 | 29                                                                | 74                                       | 7                                        | 0.282 |
| 12          | 66         | No                                                           | Present                            | 283                                                                                    | 26                                       | 9                                        | 0.916 | 86                                                                | 168                                      | 5                                        | 0.339 |
| 13          | 60         | 15x (not available)                                          | Present                            | 6                                                                                      | 130                                      | 5                                        | 0.044 | 2                                                                 | 386                                      | 3                                        | 0.005 |
| 14          | 58         | No                                                           | Not present                        | 26                                                                                     | 1                                        | 11                                       | 0.963 |                                                                   |                                          |                                          |       |
| 15          | 68         | 10x45 (past)                                                 | Not present                        | 62                                                                                     | 3                                        | 7                                        | 0.954 |                                                                   |                                          |                                          |       |
| 16          | 79         | 10x60 (past)                                                 | Present                            | 31                                                                                     | 2                                        | 2                                        | 0.939 | 4                                                                 | 23                                       | 3                                        | 0.148 |
| 17          | 54         | 15x34                                                        | Not present                        | 103                                                                                    | 5                                        | 8                                        | 0.954 |                                                                   |                                          |                                          |       |
| 18          | 76         | No                                                           | Present                            | 116                                                                                    | 2                                        | 5                                        | 0.983 | 46                                                                | 7                                        | 7                                        | 0.868 |
| 19          | 70         | 40x25 (past)                                                 | Present                            | 47                                                                                     | 16                                       | 5                                        | 0.746 | 8                                                                 | 170                                      | 7                                        | 0.045 |
| 20          | 60         | 20x (not available)                                          | Not present                        | 58                                                                                     | 0                                        | 6                                        | 1.000 |                                                                   |                                          |                                          |       |
| 21          | 72         | 20x51                                                        | Present                            | 102                                                                                    | 19                                       | 6                                        | 0.843 | 36                                                                | 94                                       | 3                                        | 0.277 |
| 22          | 66         | 10x (not available)                                          | Not present                        | 155                                                                                    | 1                                        | 14                                       | 0.994 |                                                                   |                                          |                                          |       |
| 23          | 69         | 15x (not available)                                          | Present                            | 90                                                                                     | 8                                        | 5                                        | 0.918 | 3                                                                 | 56                                       | 2                                        | 0.051 |
| 24          | 64         | 15x40                                                        | Not present                        | 56                                                                                     | 3                                        | 5                                        | 0.949 |                                                                   |                                          |                                          |       |
| 25          | 66         | 15x27                                                        | Present                            | 31                                                                                     | 115                                      | 6                                        | 0.212 | 2                                                                 | 214                                      | 11                                       | 0.009 |
| 26          | 68         | 20x30 (past)                                                 | Present                            | 47                                                                                     | 2                                        | 19                                       | 0.959 | 16                                                                | 55                                       | 8                                        | 0.225 |
| 27          | 84         | 20x57 (past)                                                 | Not present                        | 23                                                                                     | 4                                        | 15                                       | 0.852 |                                                                   |                                          |                                          |       |
| 28          | 55         | 30x36                                                        | Not present                        | 82                                                                                     | 1                                        | 8                                        | 0.988 |                                                                   |                                          |                                          |       |

Ratio =  $\frac{\text{POU2F3}^+/\text{H-PGDS}^+}{(\text{POU2F3}^+/\text{H-PGDS}^+ + \text{POU2F3}^+/\text{H-PGDS}^-)}$ . H-PGDS, haematopoietic prostaglandin D synthase; POU2F3, POU domain class 2 transcription factor 3.
